# Supplementary material
Source: PubMed Central journal article supplement (PMC7585055)
Supplement: JB.00264-20-s0001.pdf [file JB.00264-20-s0001.pdf]

# 1 SUPPLEMENTAL FIGURES

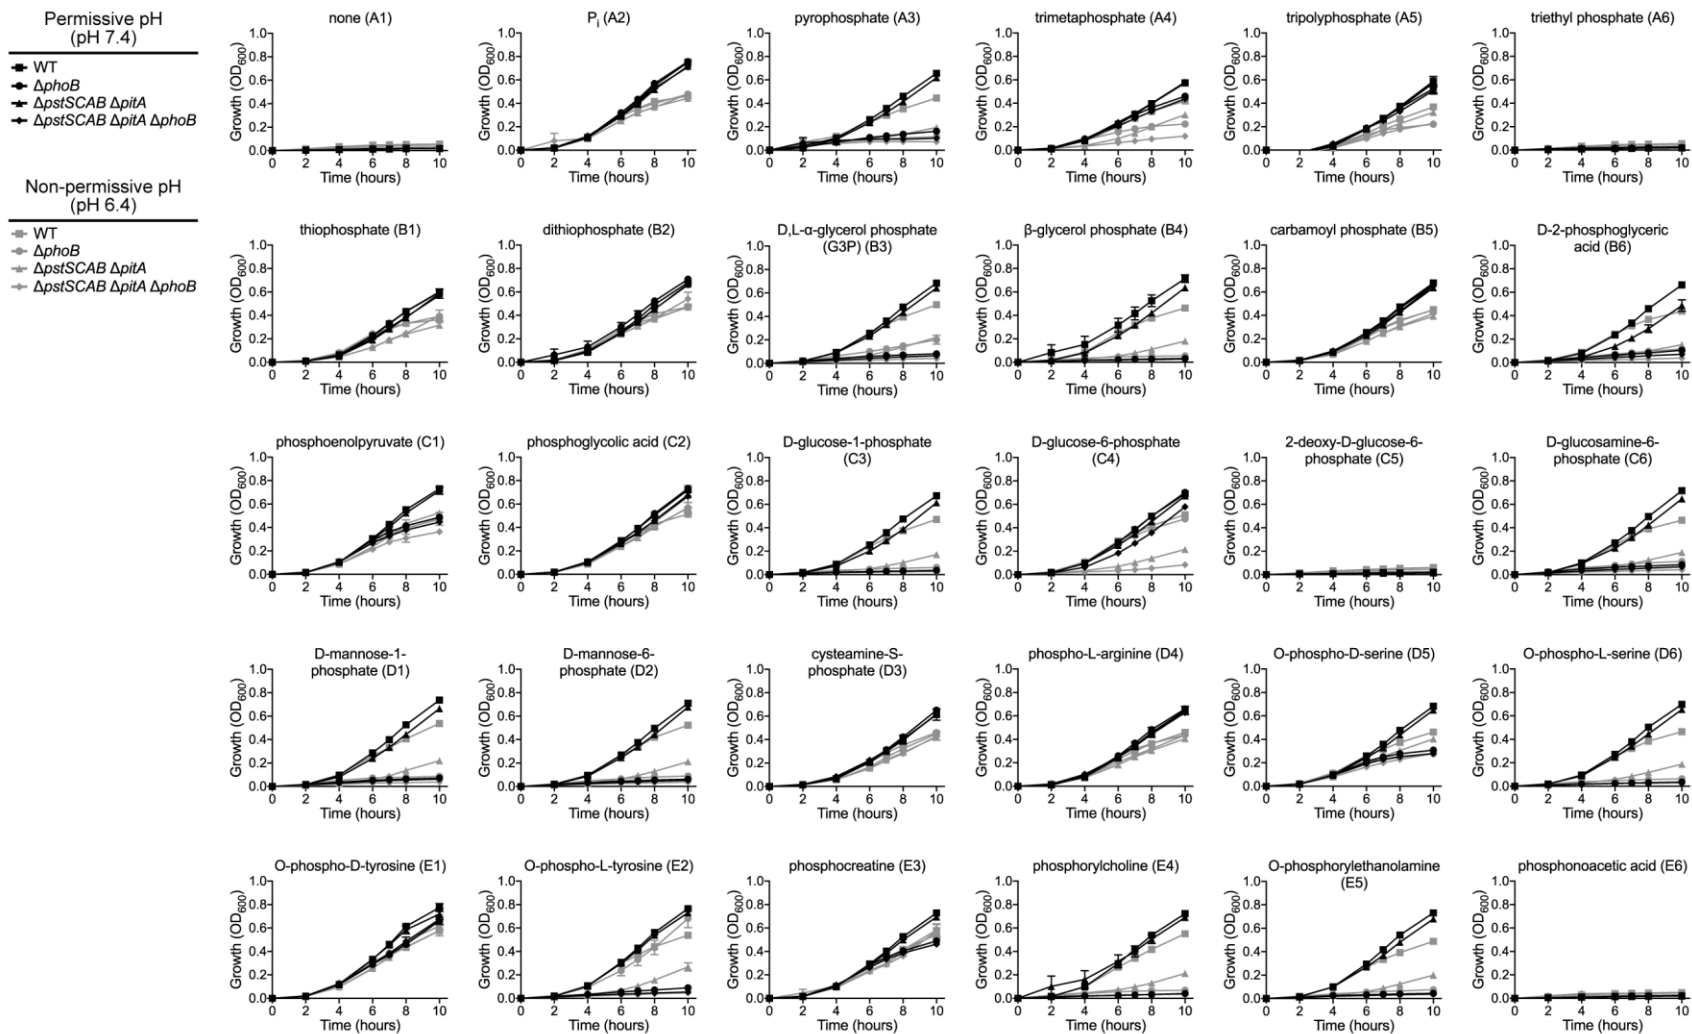

2

3 Supplemental Figure 1 (continued on next page)

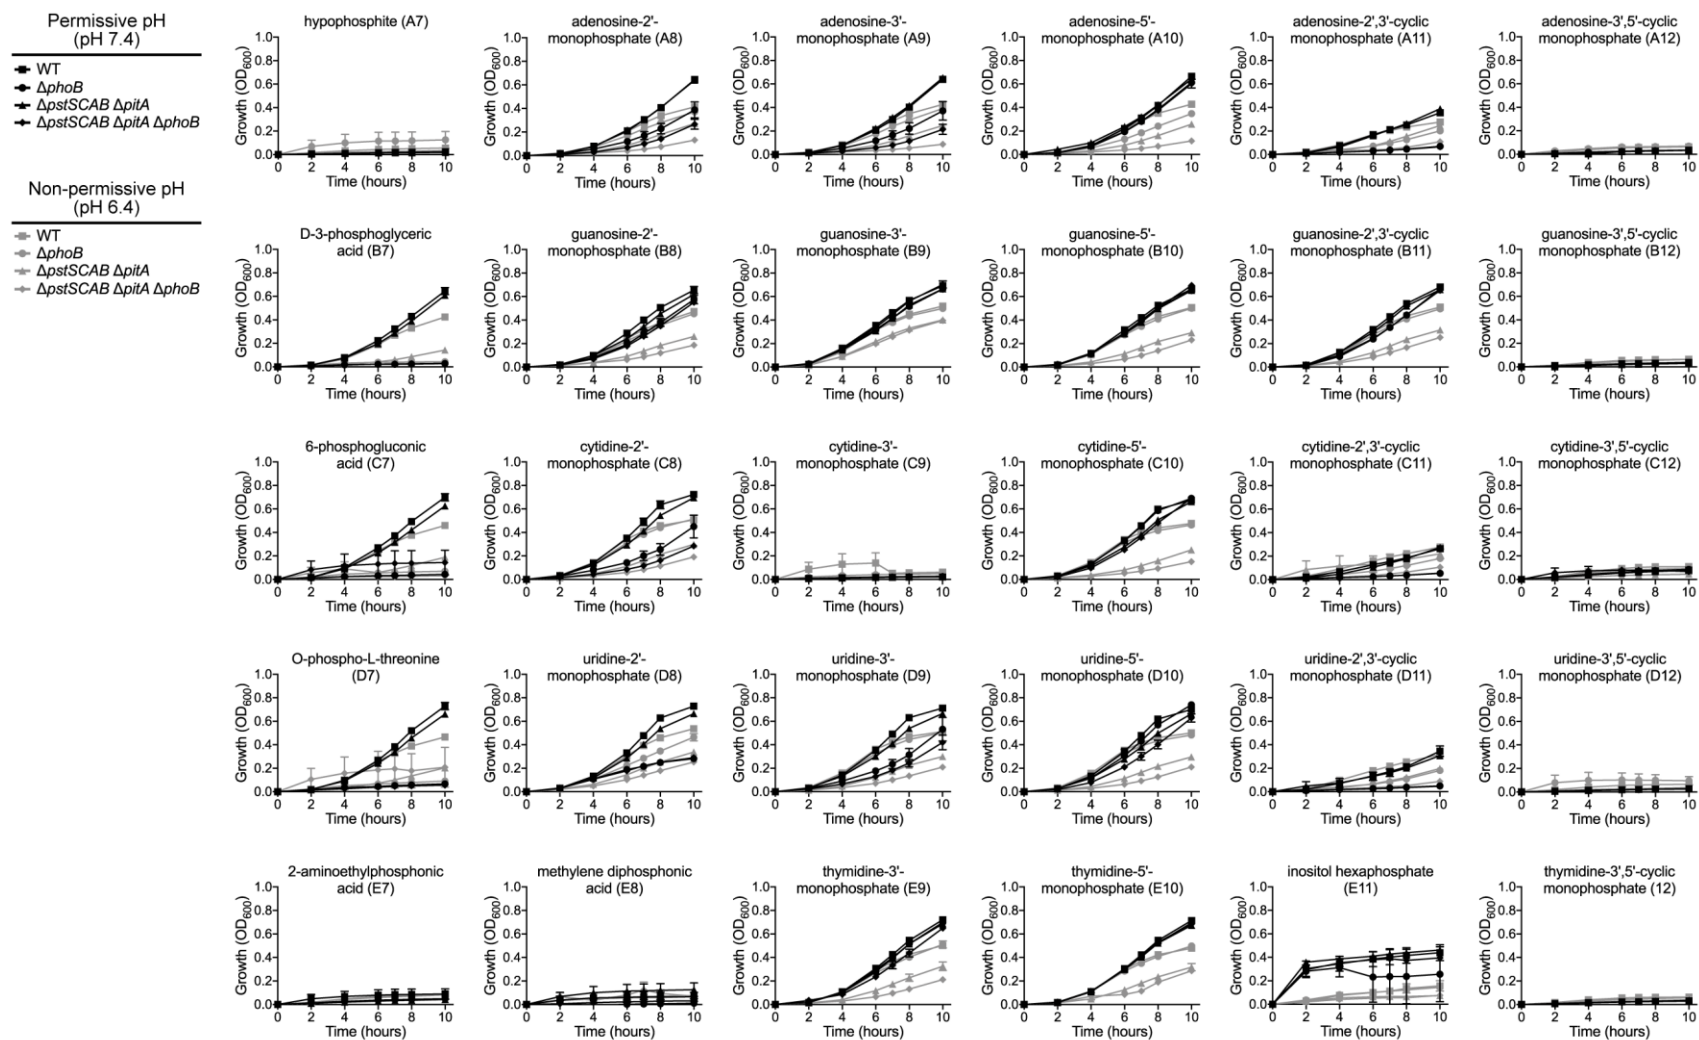

4

5 **Supplemental Figure 1 (continued from previous page). *S. aureus* can use a variety of phosphorylated molecules as phosphate**

6 **sources.** A library of 58 phosphorus-containing compounds was screened for the ability to support growth of *S. aureus* wild type,

7  $\Delta phoB$ ,  $\Delta pstSCAB \Delta pitA$ , and  $\Delta pstSCAB \Delta pitA \Delta phoB$  in defined, phosphate-deplete medium buffered to pH 7.4 (black symbols and  
8 lines) and pH 6.4 (grey symbols and lines). Growth was measured by OD<sub>600</sub> over 10 hours. The screen was performed in biological  
9 triplicate. Labels in parentheses refer to the corresponding Biolog plate wells.

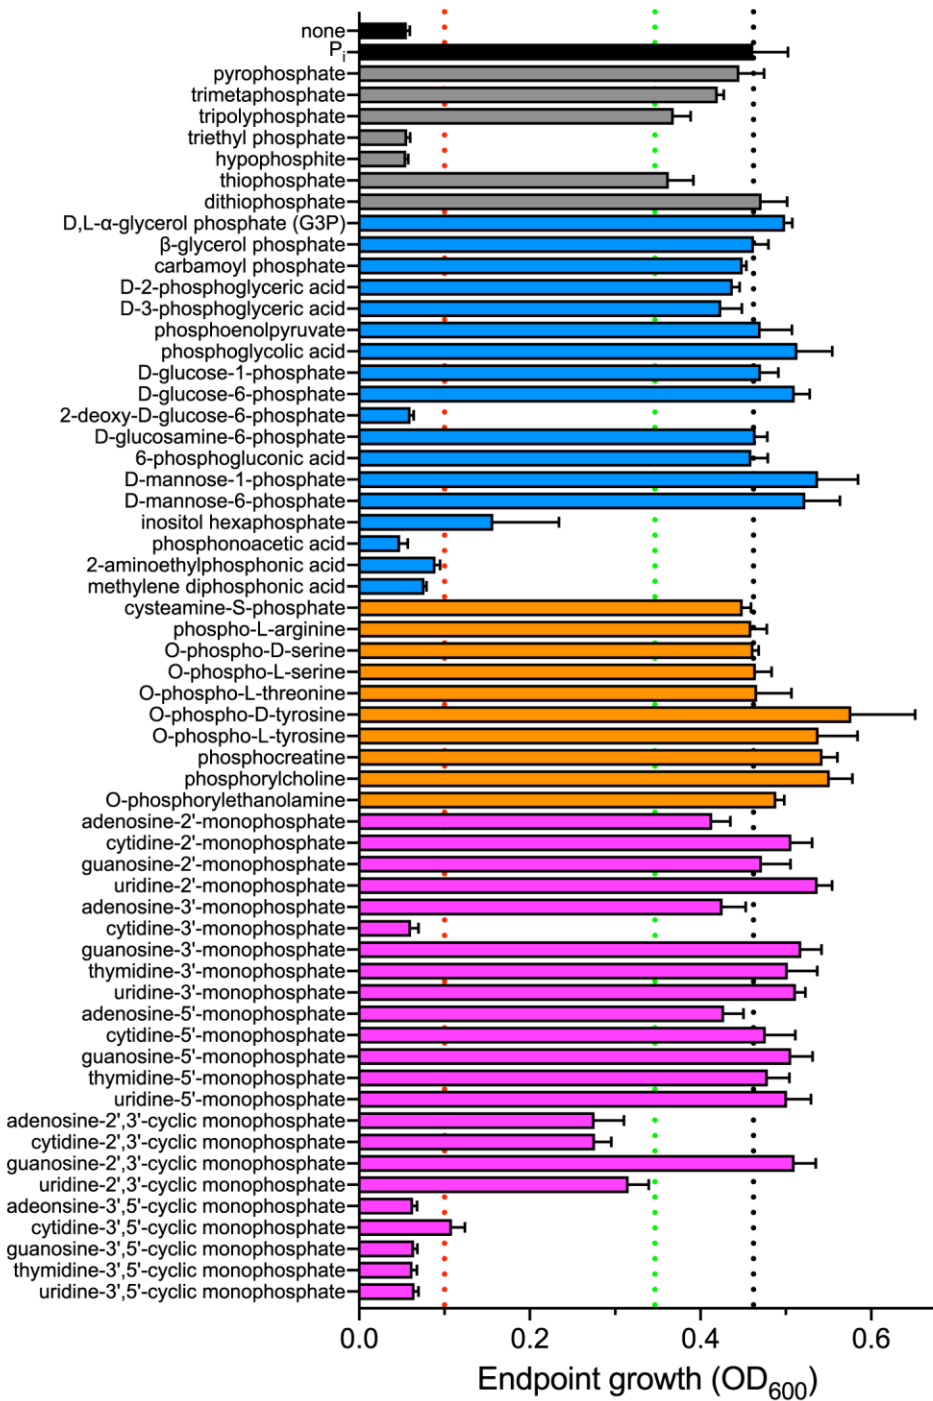

10 **Figure S2**

11 **Supplemental Figure 2. An acidic pH does not alter the phosphate sources that can support**  
 12 **growth of *S. aureus*.** A library of 58 phosphorus-containing compounds, including inorganic  
 13 molecules (grey), carbohydrates (blue), amino acids (orange), and nucleotides (purple), was

14 screened for the ability to support growth of *S. aureus* in defined, phosphate-deplete medium  
15 buffered to pH 6.4. Growth was monitored by OD<sub>600</sub> and endpoint growth after 10 hours is  
16 reported. The screen was performed in biological triplicate; error bars indicate standard  
17 deviation. An OD<sub>600</sub> >0.1 (red dotted line) was used as the threshold to define phosphate sources.  
18 The black dotted line delineates growth on the positive control, P<sub>i</sub>. The green dotted line denotes  
19 75% of growth on the positive control, used as the threshold to define good phosphate sources.

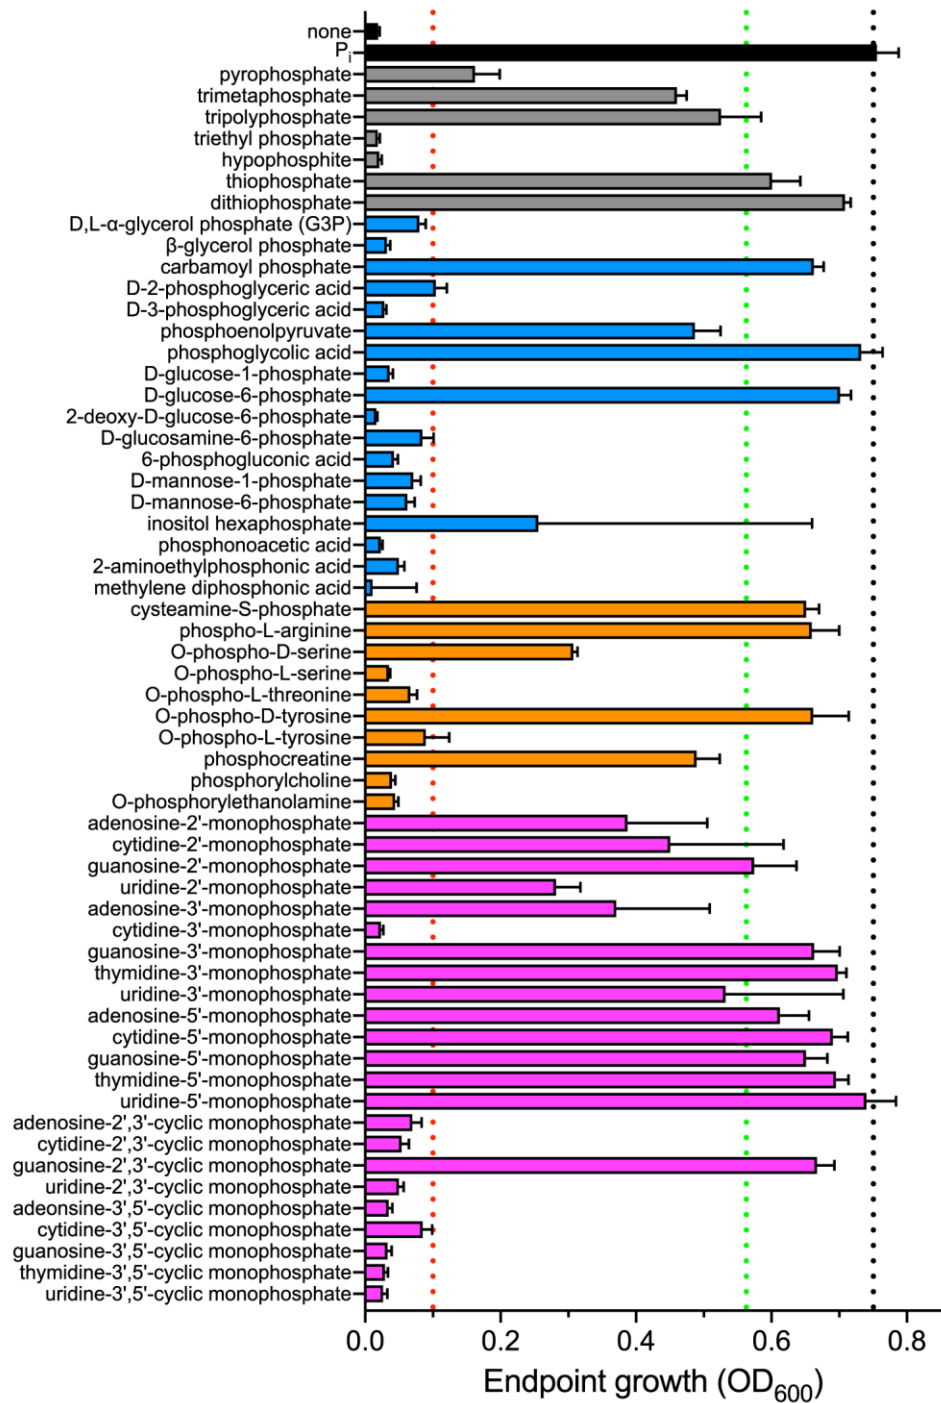

20 **Figure S3A**

21 **Supplemental Figure 3A**

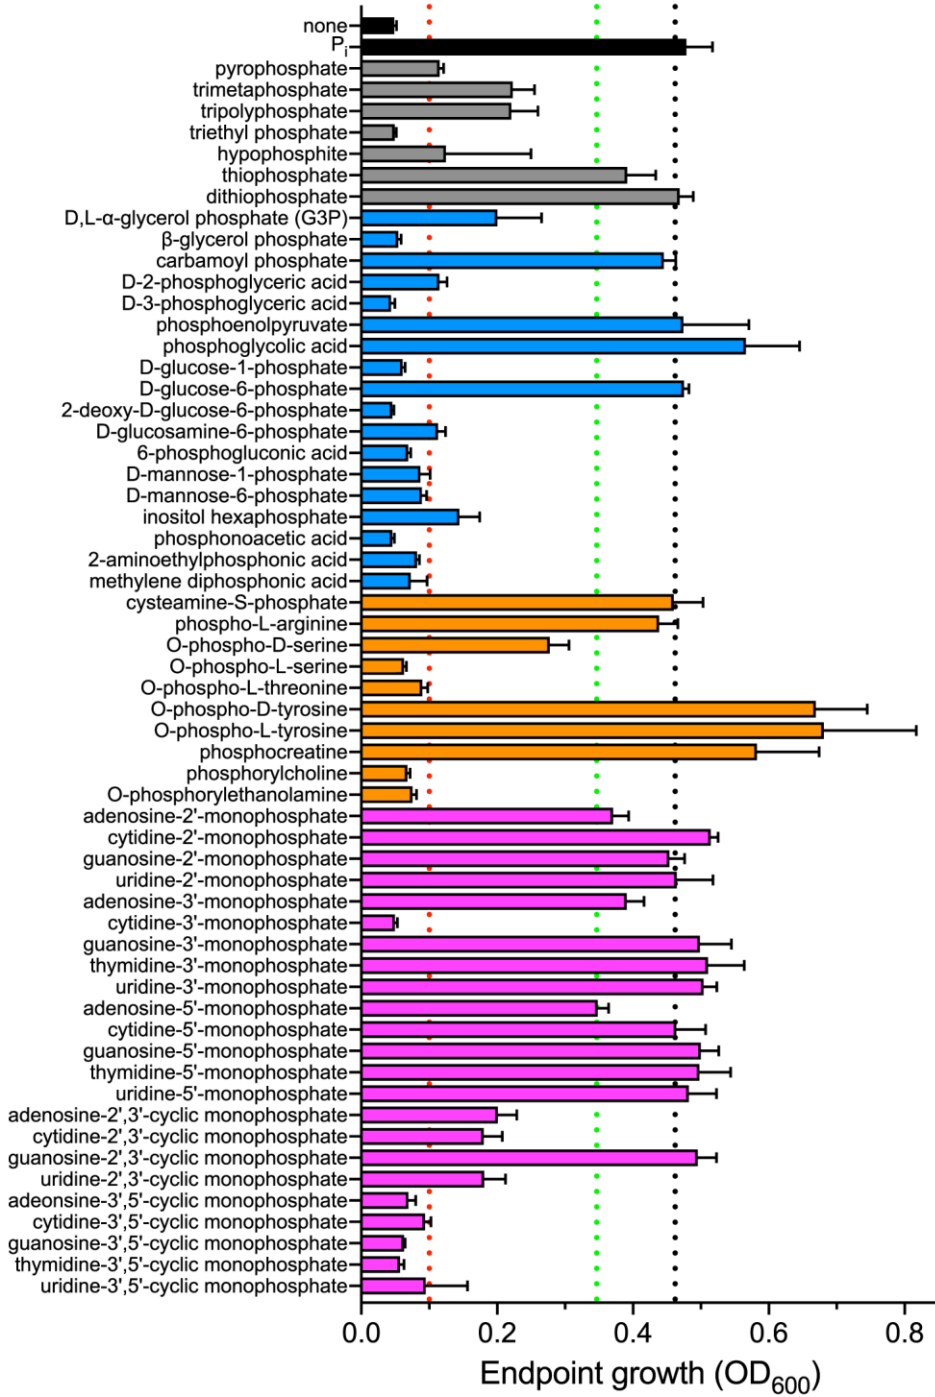

22 **Figure S3B**

23 **Supplemental Figure 3B**

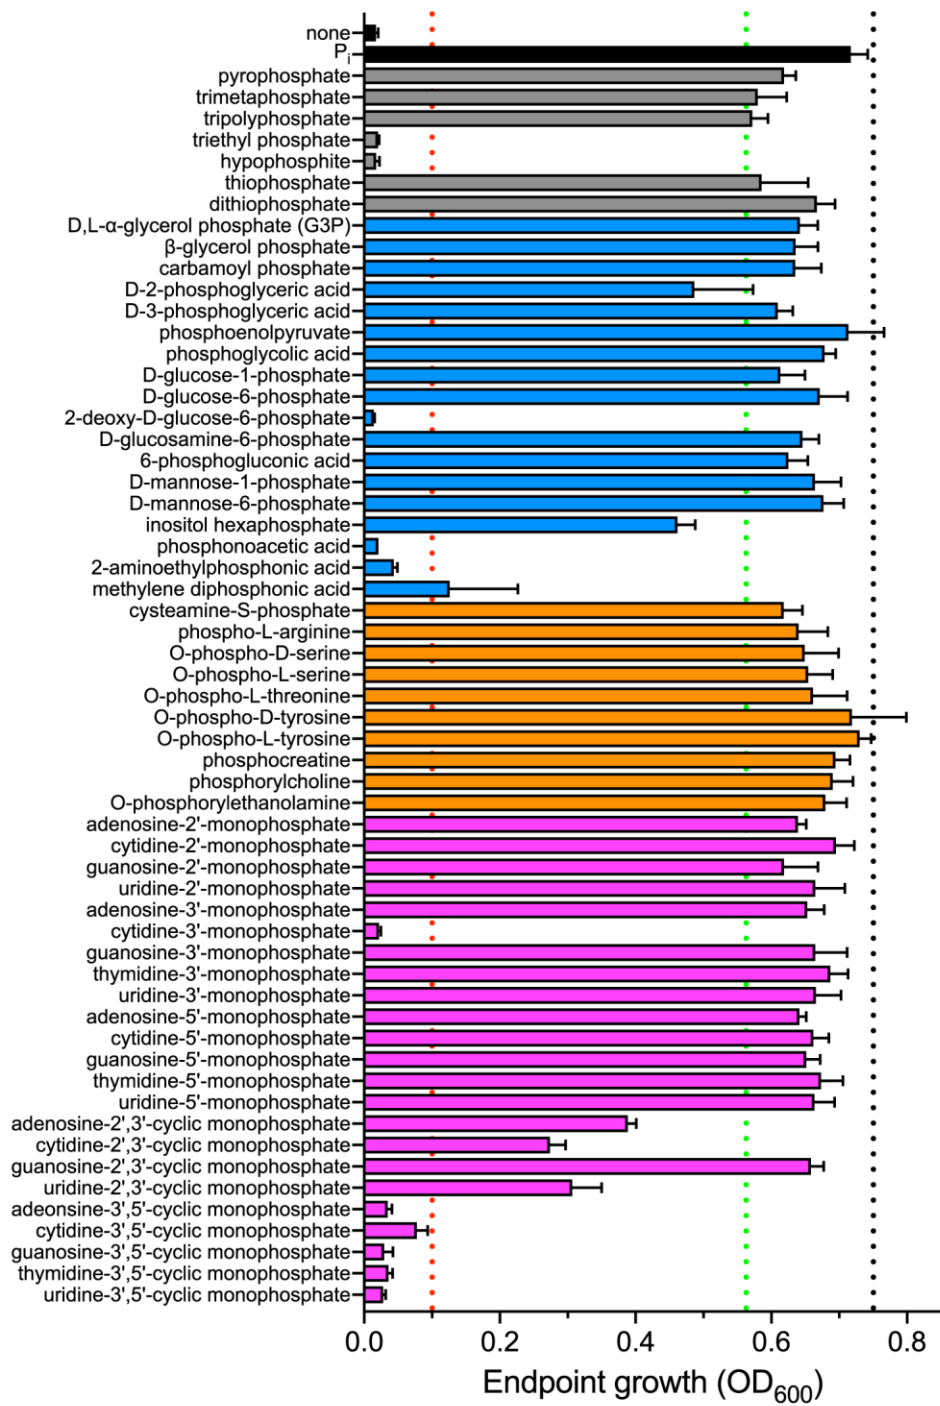

24 **Figure S3C**

25 **Supplemental Figure 3C**



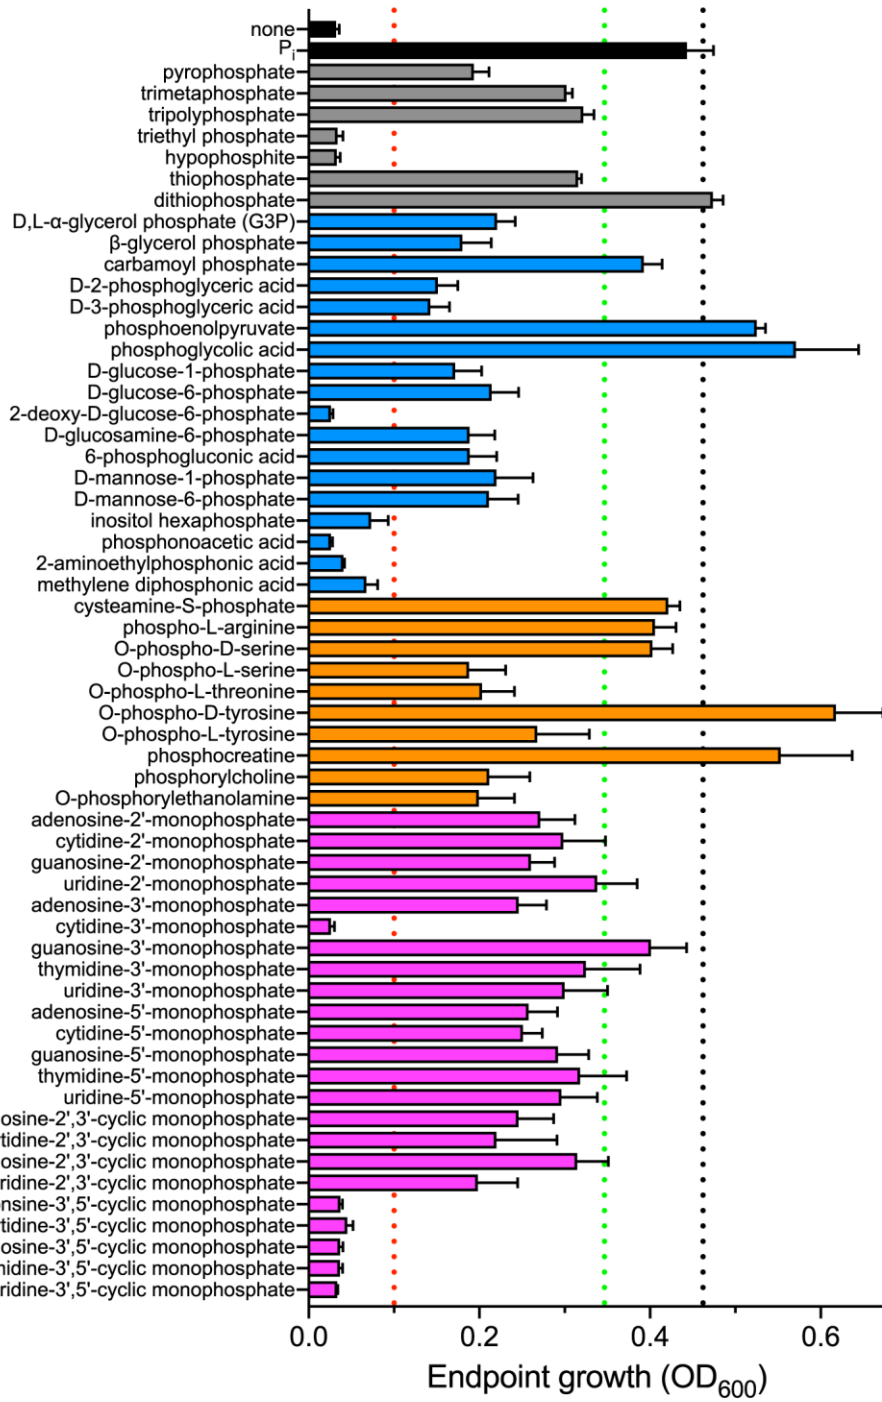

26 **Figure S3D**

27 **Supplemental Figure 3D**

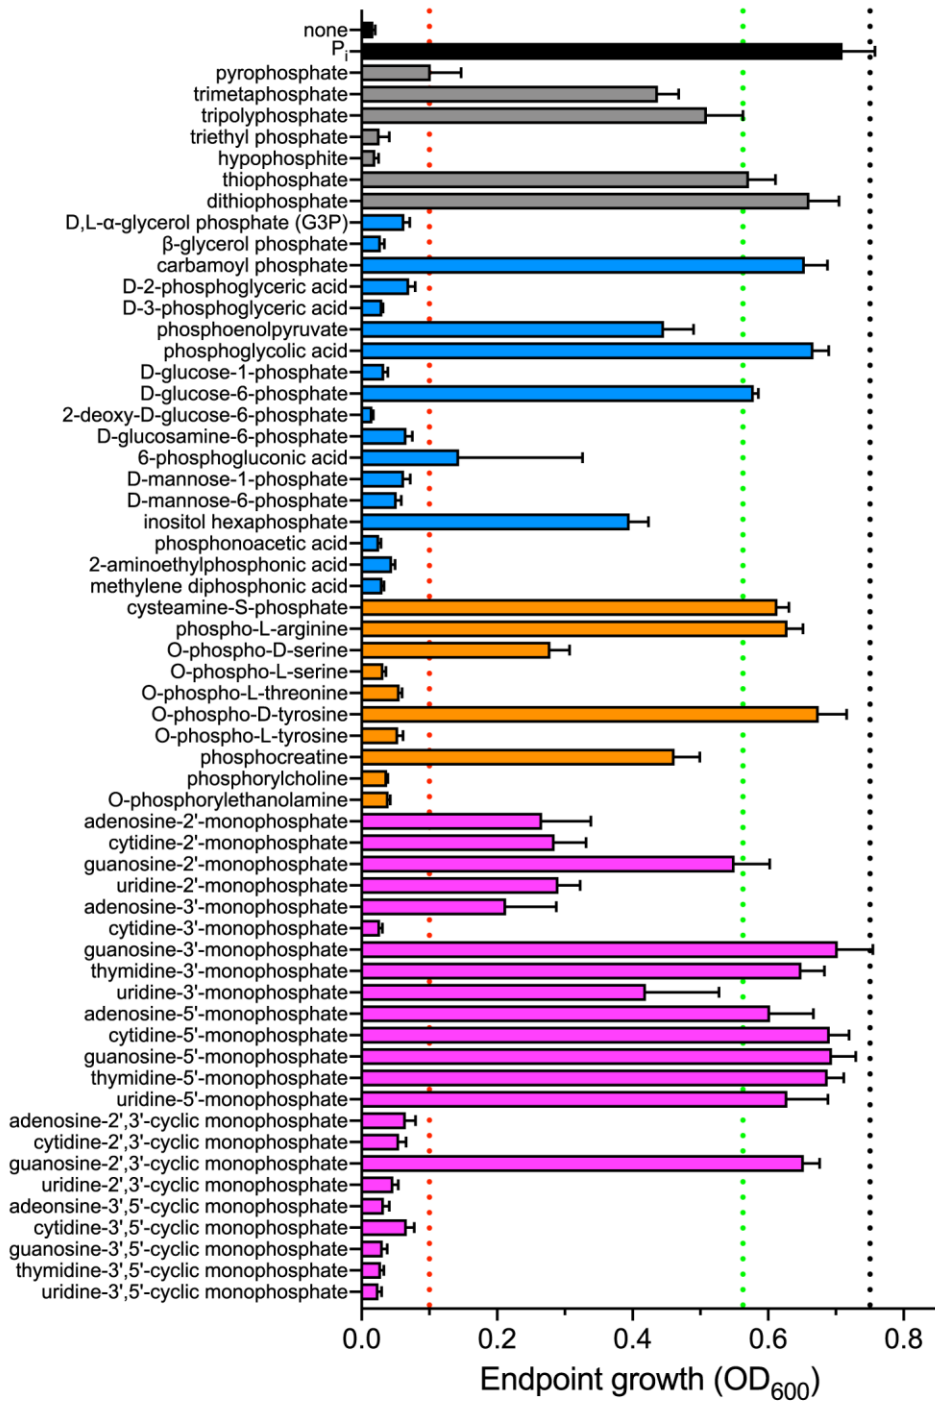

28 **Figure S3E**

29 **Supplemental Figure 3E**

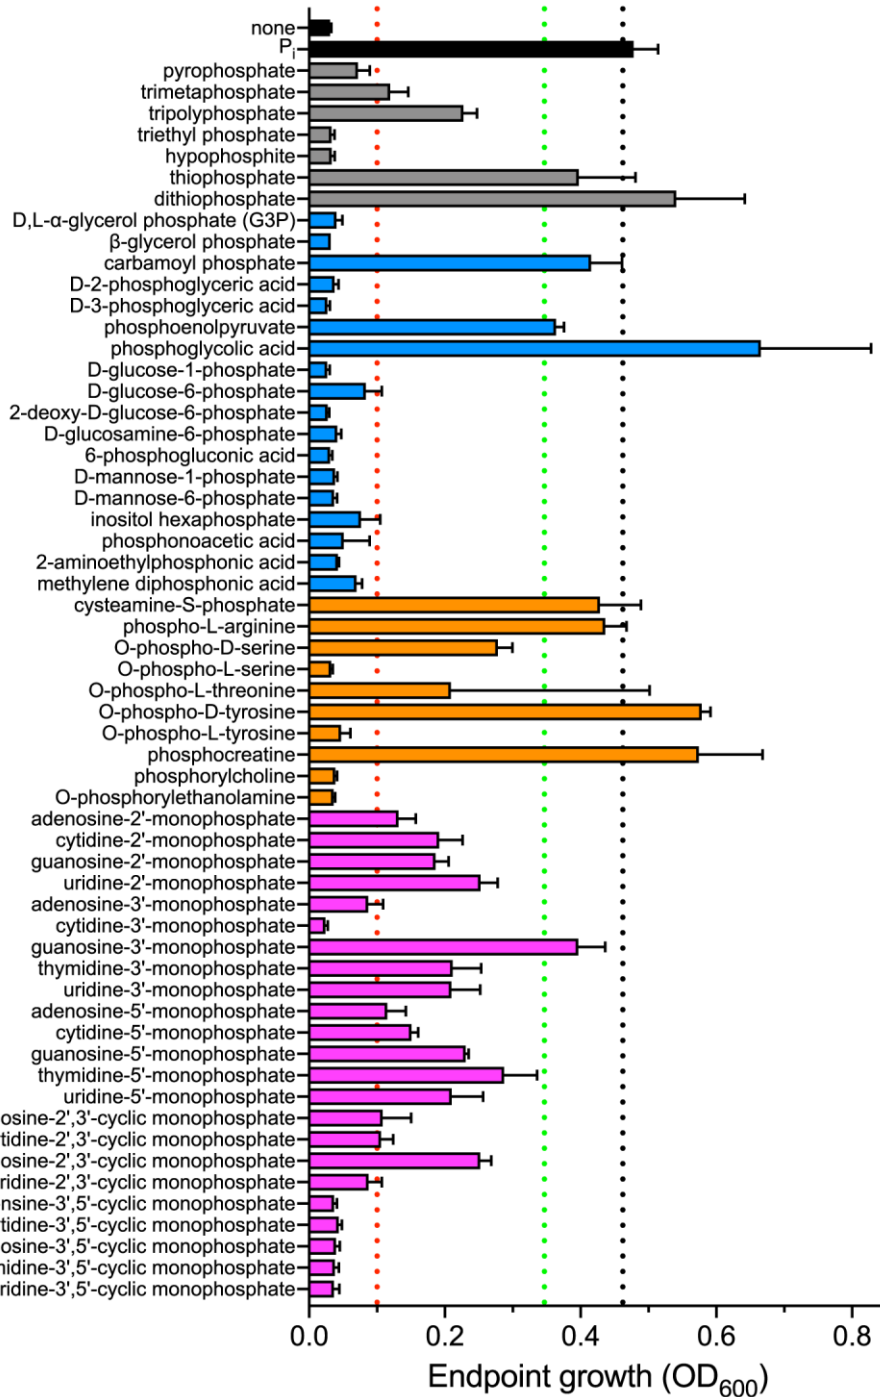

30 **Figure S3F**

31 **Supplemental Figure 3F**

32 **Supplemental Figure 3. Growth of the  $\Delta phoB$ ,  $\Delta pstSCAB \Delta pitA$ , and  $\Delta pstSCAB \Delta pitA$**

33  **$\Delta phoB$  mutants on potential phosphate sources. A library of 58 phosphorus-containing**

34 compounds was screened for the ability to support growth of  $\Delta phoB$  (**A** and **B**),  $\Delta pstSCAB \Delta pitA$   
35 (**C** and **D**), and  $\Delta pstSCAB \Delta pitA \Delta phoB$  (**E** and **F**) mutants in defined, phosphate-deplete  
36 medium buffered to pH 7.4 (**A**, **C**, and **E**) and pH 6.4 (**B**, **D**, and **F**). Growth was monitored by  
37  $OD_{600}$  and endpoint growth after 10 hours is reported. The screen was performed in biological  
38 triplicate; error bars indicate standard deviation. An  $OD_{600} > 0.1$  (red dotted line) was used as the  
39 threshold to define phosphate sources. The black dotted line delineates growth of wild-type *S.*  
40 *aureus* on the positive control ( $P_i$ ) for each pH (see Fig. 1 and Supplemental Fig. 2). The green  
41 dotted line denotes 75% of growth of wild type on the positive control ( $P_i$ ), used as the threshold  
42 to define good phosphate sources for wild type.

43
